# Supplementary material for: p.E95K mutation in Indian hedgehog causing brachydactyly type A1 impairs IHH/Gli1 downstream transcriptional regulation
Source: BMC Genet. 2019 Jan 16;20:10. doi: 10.1186/s12863-018-0697-5 (PMC6335781; doi:10.1186/s12863-018-0697-5)
Supplement: Supplementary file 1 — ChIP Primers. Primer sequences used for ChIP validation. (XLSX 11 kb) [file 12863_2018_697_MOESM1_ESM.xlsx]

## Sheet: ChIP-chip Validation Primers
Group	ID	Range	Forward Primer	Reverse Primer	Confirmed
WT	MA2C_peak_93	chr14:75534840-75535788	TGGTAAGTCTCAGCAACA	TTAGAAGCACAGGCAAGA	+
WT	MA2C_peak_85	chr14:49686646-49687794	TGAAGTTGTTACCTGTCTCT	AGTTCCTCAGTTACACCATT	+
WT	MA2C_peak_303	chr9:13629990-13631228	GCTCCAACTCTTCTCCTT	AGATTACCAACACCTTCAGA	+
WT	MA2C_peak_282	chr8:13058531-13059571	CTTGGCATCACTGACTCT	CCTGGAACTCACTCTGTAG	+
WT	MA2C_peak_97	chr14:99500664-99501820	ATGGAATGCCTGGTAGAG	GCTGAGATGGAGAGTGAA	+
MT	MA2C_peak_21	chr4:62068580-62069723	CTACTACGGCTCCAGAAC	GACTCACTTCCACACTCA	+
MT	MA2C_peak_46	chrX:140751178-140751837	CATAGATGGAAGTAGATTGGATAA	TTGGTGCTGTTAGGAAGA	+
MT	MA2C_peak_17	chr2:152225006-152226039	ATAGTCACTTGCCTGAGTT	ACGGAGAACGAATGAGAG	+
MT	MA2C_peak_42	chr9:38344412-38345183	AGCAGATGACTAGATGTGAT	ATATTGTGAAGGTACTGTATAAGG	+
MT	MA2C_peak_8	chr16:17408338-17409193	GCCTACTCATCCTTACATCT	CCACTCCTCCAGGTTATG	+

## Sheet: Expression Validation Primers
Gene	Forward Primer	Reverse Primer	Confirmed in replicate 1	Confirmed in replicate 2
Gapdh	GAAACCTGCCAAGTATGATGACA	GGTCCTCAGTGTAGCCCAAGA	+	+
Ptch1	TCAGTTGACTAAACAGCGTCTGGTA	GACCCAAGCGGTCAGGTAGAT	+	+
Gli1	GGCTGTCGGAAGTCCTATTCAC	CAACCTTCTTGCTCACACATGTAAG	+	+
Wnt5a	GTGCAATGTCTTCCAAGTTCTTC	GGCACAGTTTCTTCTGTCCTTG	+	+
Wnt16	GAGCTGTGCAAGAGGAAACC	TCCTGTGGTGTTTCTGATGG	+	-
NFAT2	GCTATGCATCCTCCAACGTC	AGTTGGACTCGTAGGAGGAG	+	+
HPRT1	TGACACTGGCAAAACAATGCA	GGTCCTTTTCACCAGCAAGCT	+	+
